# Supplementary material
Source: publisher figshare collection journal article supplement (https://gsajournals.figshare.com/ndownloader/files/26550956)
Supplement: Supplementary file 1 [file 26550956]

## Sheet: subsp. multiplex
	Table S7. Subsp multiplex genes with dN/dS>1
	gene	dN/dS	GC	r/m	COG class
	cbpA	24.2142	55	9.82571	CELLULAR PROCESSES AND SIGNALING
	clp	1.1717	52	8.93297	CELLULAR PROCESSES AND SIGNALING
	groL	1.0209	50	3.79671	CELLULAR PROCESSES AND SIGNALING
	group_1896	1.1452	57	16.5763	CELLULAR PROCESSES AND SIGNALING
	group_2880	13.2564	53	9.38508	CELLULAR PROCESSES AND SIGNALING
	group_3556	6.7309	53	11.6767	CELLULAR PROCESSES AND SIGNALING
	group_3560	28.3165	55	9.80454	CELLULAR PROCESSES AND SIGNALING
	gumD_2	21.8364	43	9.73694	CELLULAR PROCESSES AND SIGNALING
	hslO	28.8806	49	9.41461	CELLULAR PROCESSES AND SIGNALING
	kdsA	28.4565	52	9.83164	CELLULAR PROCESSES AND SIGNALING
	lolB	13.9126	57	42.1684	CELLULAR PROCESSES AND SIGNALING
	lpxC	1.489	50	9.51026	CELLULAR PROCESSES AND SIGNALING
	mip	29.6103	52	9.58129	CELLULAR PROCESSES AND SIGNALING
	msrA	14.4926	50	14.6901	CELLULAR PROCESSES AND SIGNALING
	msrC	34.2257	53	9.88234	CELLULAR PROCESSES AND SIGNALING
	pal	1.063	47	26.9791	CELLULAR PROCESSES AND SIGNALING
	pilA_1	5.1677	49	3.22508	CELLULAR PROCESSES AND SIGNALING
	soj	1.4539	53	50.8198	CELLULAR PROCESSES AND SIGNALING
	sspA	1.4737	45	9.4539	CELLULAR PROCESSES AND SIGNALING
	sufD	1.007	59	4.63706	CELLULAR PROCESSES AND SIGNALING
	trxB	13.6565	53	9.81241	CELLULAR PROCESSES AND SIGNALING
	wbpA	30.4413	52	9.76215	CELLULAR PROCESSES AND SIGNALING
	yadH	33.826	50	9.65743	CELLULAR PROCESSES AND SIGNALING
	alkA	45.6758	55	9.58945	INFORMATION STORAGE AND PROCESSING
	group_3111	16.6201	55	9.84636	INFORMATION STORAGE AND PROCESSING
	group_410	1.008	56	2.26793	INFORMATION STORAGE AND PROCESSING
	group_4630	1.0584	58	9.54609	INFORMATION STORAGE AND PROCESSING
	group_4720	1.4739	53	7.94132	INFORMATION STORAGE AND PROCESSING
	group_771	21.2506	58	9.62897	INFORMATION STORAGE AND PROCESSING
	hrcA	1.5731	54	6.52883	INFORMATION STORAGE AND PROCESSING
	ihfB	10.8132	49	9.81282	INFORMATION STORAGE AND PROCESSING
	infA	4.491	44	32.1387	INFORMATION STORAGE AND PROCESSING
	mprA_1	25.0498	43	9.82958	INFORMATION STORAGE AND PROCESSING
	parB	1.1961	55	9.55243	INFORMATION STORAGE AND PROCESSING
	prfC	28.5502	50	7.62042	INFORMATION STORAGE AND PROCESSING
	pth	30.7633	49	9.87686	INFORMATION STORAGE AND PROCESSING
	rarA	33.2597	55	8.50077	INFORMATION STORAGE AND PROCESSING
	rimM	19.9286	52	9.67591	INFORMATION STORAGE AND PROCESSING
	rlmL_1	1.2356	57	36.6752	INFORMATION STORAGE AND PROCESSING
	rng	20.2312	52	18.3332	INFORMATION STORAGE AND PROCESSING
	rplL	14.9589	44	9.91214	INFORMATION STORAGE AND PROCESSING
	rplM	11.1092	52	9.07515	INFORMATION STORAGE AND PROCESSING
	rplS	10.2585	49	9.89498	INFORMATION STORAGE AND PROCESSING
	rpmC	27.6835	41	9.94653	INFORMATION STORAGE AND PROCESSING
	rpmE2	11.5482	43	9.80879	INFORMATION STORAGE AND PROCESSING
	rpsD	19.1136	42	9.74066	INFORMATION STORAGE AND PROCESSING
	rpsF	7.6363	51	9.90341	INFORMATION STORAGE AND PROCESSING
	rpsJ	33.1461	48	9.86242	INFORMATION STORAGE AND PROCESSING
	rpsP	8.5624	54	9.80233	INFORMATION STORAGE AND PROCESSING
	tatD	1.4446	51	9.33323	INFORMATION STORAGE AND PROCESSING
	acpP	14.2363	47	9.56549	METABOLISM
	apaG	14.7574	54	9.41216	METABOLISM
	apbE	1.1792	55	9.09845	METABOLISM
	argF_	1.1734	54	2.66234	METABOLISM
	aroQ1	32.3701	53	9.90057	METABOLISM
	atpB	1.2486	46	8.40964	METABOLISM
	atpC	9.3087	50	9.87575	METABOLISM
	atpF	31.6348	44	9.89551	METABOLISM
	atpG	26.2225	48	9.57764	METABOLISM
	bioB	31.0025	51	8.64284	METABOLISM
	birA	33.9544	51	9.8145	METABOLISM
	carA	3.0884	53	8.43328	METABOLISM
	cysW	1.0129	53	14.8166	METABOLISM
	dctA2	1.1959	55	13.7426	METABOLISM
	estB	1.0481	53	10.0922	METABOLISM
	fadD	2.6033	48	8.21455	METABOLISM
	folB	38.5163	49	9.91701	METABOLISM
	folC	28.5542	52	8.80052	METABOLISM
	gcvH	10.1558	49	9.91052	METABOLISM
	glk_1	28.3967	58	8.64505	METABOLISM
	gmk	15.4545	53	9.87095	METABOLISM
	group_1232	1.413	56	13.0594	METABOLISM
	group_1457	10.7637	55	9.81089	METABOLISM
	group_1955	1.4309	48	8.51148	METABOLISM
	group_2854	1.0119	55	8.53323	METABOLISM
	group_3372	9.8615	58	9.80596	METABOLISM
	group_3490	13.5849	60	9.87221	METABOLISM
	group_3506	1.0571	54	9.49937	METABOLISM
	group_3611	35.5349	41	9.68871	METABOLISM
	group_4742	13.5228	55	9.72545	METABOLISM
	hchA	1.2209	53	9.38646	METABOLISM
	hisA	5.0461	61	7.01606	METABOLISM
	ispA	1.1881	58	9.40626	METABOLISM
	mqo	2.1141	53	8.43945	METABOLISM
	nth	20.9177	51	9.85843	METABOLISM
	nuoM	2.4507	50	8.66821	METABOLISM
	pdxH	15.6977	55	9.8752	METABOLISM
	ppnN	1.0149	52	6.09989	METABOLISM
	pstC	1.246	53	32.6085	METABOLISM
	ptsH	25.7381	51	9.93227	METABOLISM
	sdh	22.61	57	9.69241	METABOLISM
	surE	33.2322	57	9.84146	METABOLISM
	tpiA	33.7962	54	9.76836	METABOLISM
	trpA	1.1167	58	9.67034	METABOLISM
	trpG	24.9706	49	9.70992	METABOLISM
	yciC	24.4064	54	9.18924	METABOLISM
	yeaD	2.5013	58	8.80746	METABOLISM
	yfhM_2	1.4601	57	19.1246	METABOLISM
	yihS	29.401	53	8.94827	METABOLISM
	ypjD_1	1.165	48	15.0381	METABOLISM
	group_1604	10.5124	49	9.30152	MULTIPLE CATEGORIES
	group_4593	23.0723	51	9.68271	MULTIPLE CATEGORIES
	group_8959	7.048	47	9.82445	MULTIPLE CATEGORIES
	mutX	41.8052	52	9.78733	MULTIPLE CATEGORIES
	phoB	8.5778	53	9.85312	MULTIPLE CATEGORIES
	trxA_2	10.0122	47	9.91981	MULTIPLE CATEGORIES
	act	1.1199	54	58.0134	POORLY CHARACTERIZED
	bamD	1.0994	54	11.7904	POORLY CHARACTERIZED
	comEC	1.0394	57	10.9271	POORLY CHARACTERIZED
	crcB	36.3899	50	9.81808	POORLY CHARACTERIZED
	dedD	11.6971	51	9.70969	POORLY CHARACTERIZED
	djlA	35.9601	54	9.92193	POORLY CHARACTERIZED
	dksA	1.0223	51	9.15606	POORLY CHARACTERIZED
	erpA	474.608	48	9.05754	POORLY CHARACTERIZED
	fabG_1	35.408	52	9.84943	POORLY CHARACTERIZED
	fda	1.0582	53	9.43925	POORLY CHARACTERIZED
	ftsB	43.9116	52	9.92853	POORLY CHARACTERIZED
	ftsY	1.5412	50	9.45409	POORLY CHARACTERIZED
	gacA	27.6567	46	9.57878	POORLY CHARACTERIZED
	glmU	1.2149	55	7.92225	POORLY CHARACTERIZED
	gph	68.0927	56	9.86087	POORLY CHARACTERIZED
	gpr	29.1699	53	8.23989	POORLY CHARACTERIZED
	group_1144	41.3772	42	9.78995	POORLY CHARACTERIZED
	group_1146	1.3714	48	11.3147	POORLY CHARACTERIZED
	group_1148	3.8223	66	4.2589	POORLY CHARACTERIZED
	group_1150	1.4064	66	6.77892	POORLY CHARACTERIZED
	group_1151	2.0487	65	8.2151	POORLY CHARACTERIZED
	group_1152	3.6005	64	4.0186	POORLY CHARACTERIZED
	group_1162	1.0129	41	39.7462	POORLY CHARACTERIZED
	group_1203	3.5218	55	11.9284	POORLY CHARACTERIZED
	group_1310	1.5356	54	2.4167	POORLY CHARACTERIZED
	group_1312	24.7393	53	2.40067	POORLY CHARACTERIZED
	group_1313	1.5079	54	1.89251	POORLY CHARACTERIZED
	group_1323	15.0495	52	9.94694	POORLY CHARACTERIZED
	group_1368	26.5944	57	8.52663	POORLY CHARACTERIZED
	group_1443	1.5682	63	108.954	POORLY CHARACTERIZED
	group_1460	11.7622	46	9.93243	POORLY CHARACTERIZED
	group_1498	1.4802	59	12.1911	POORLY CHARACTERIZED
	group_1501	1.4088	44	1.922	POORLY CHARACTERIZED
	group_1503	1.1617	45	3.39815	POORLY CHARACTERIZED
	group_1506	1.1862	45	18.8519	POORLY CHARACTERIZED
	group_1542	1.2751	52	8.35234	POORLY CHARACTERIZED
	group_1611	1.5913	47	13.1494	POORLY CHARACTERIZED
	group_1612	2.7526	50	7.81368	POORLY CHARACTERIZED
	group_1635	1.0099	57	7.56657	POORLY CHARACTERIZED
	group_1684	1.3079	57	2.87723	POORLY CHARACTERIZED
	group_1689	1.4845	56	3.58869	POORLY CHARACTERIZED
	group_1898	1.2526	58	7.16369	POORLY CHARACTERIZED
	group_1928	25.0705	56	9.80334	POORLY CHARACTERIZED
	group_2027	1.1343	64	2.23988	POORLY CHARACTERIZED
	group_2050	1.321	21	56.8381	POORLY CHARACTERIZED
	group_2132	1.0869	58	9.09837	POORLY CHARACTERIZED
	group_2278	22.8685	38	9.89146	POORLY CHARACTERIZED
	group_2285	25.538	57	9.41362	POORLY CHARACTERIZED
	group_2290	15.1865	52	9.43185	POORLY CHARACTERIZED
	group_2340	1.9249	62	10.5479	POORLY CHARACTERIZED
	group_2343	1.6137	61	29.3487	POORLY CHARACTERIZED
	group_2378	2.249	58	1.6197	POORLY CHARACTERIZED
	group_2381	1.8637	58	2.81829	POORLY CHARACTERIZED
	group_2384	2.0085	57	3.59943	POORLY CHARACTERIZED
	group_2390	28.6713	62	2.14938	POORLY CHARACTERIZED
	group_2633	2.0245	54	3.22283	POORLY CHARACTERIZED
	group_2676	20.8281	49	9.83153	POORLY CHARACTERIZED
	group_2683	1.1965	47	3.10392	POORLY CHARACTERIZED
	group_2695	1.0323	61	9.22537	POORLY CHARACTERIZED
	group_2696	1.2038	62	9.07885	POORLY CHARACTERIZED
	group_2751	24.0158	52	9.72521	POORLY CHARACTERIZED
	group_2785	1.0142	32	9.20731	POORLY CHARACTERIZED
	group_2859	27.5538	35	2.56966	POORLY CHARACTERIZED
	group_2861	1.5472	61	9.18309	POORLY CHARACTERIZED
	group_2863	21.7883	57	9.76939	POORLY CHARACTERIZED
	group_2906	13.4815	55	8.90399	POORLY CHARACTERIZED
	group_2928	25.0904	55	9.76156	POORLY CHARACTERIZED
	group_2930	24.7654	55	9.64591	POORLY CHARACTERIZED
	group_2931	1.1159	59	16.4269	POORLY CHARACTERIZED
	group_2965	1.3988	55	52.3032	POORLY CHARACTERIZED
	group_2970	10.0447	51	10.0738	POORLY CHARACTERIZED
	group_2994	14.6437	54	10.2391	POORLY CHARACTERIZED
	group_3054	1.4256	36	9.5145	POORLY CHARACTERIZED
	group_3101	2.3978	52	9.05189	POORLY CHARACTERIZED
	group_3147	1.2599	52	1.959	POORLY CHARACTERIZED
	group_3176	1.3846	65	7.84475	POORLY CHARACTERIZED
	group_3177	1.1466	65	5.16145	POORLY CHARACTERIZED
	group_3178	1.7891	64	10.7229	POORLY CHARACTERIZED
	group_3209	28.1341	61	1.92688	POORLY CHARACTERIZED
	group_3210	3.8182	61	2.16437	POORLY CHARACTERIZED
	group_3212	1.9158	60	1.91238	POORLY CHARACTERIZED
	group_3214	29.0413	59	1.96508	POORLY CHARACTERIZED
	group_3215	28.9925	59	1.8428	POORLY CHARACTERIZED
	group_3217	27.4575	59	2.33749	POORLY CHARACTERIZED
	group_3220	1.3289	32	13.3188	POORLY CHARACTERIZED
	group_3222	1.0746	31	13.43	POORLY CHARACTERIZED
	group_3280	1.6519	57	5.59855	POORLY CHARACTERIZED
	group_3298	1.5007	44	26.5387	POORLY CHARACTERIZED
	group_3315	1.0266	47	51.0261	POORLY CHARACTERIZED
	group_3349	53.3095	51	9.46242	POORLY CHARACTERIZED
	group_3413	1.4188	49	1.96444	POORLY CHARACTERIZED
	group_3448	13.7989	51	10.4404	POORLY CHARACTERIZED
	group_3492	23.3113	58	9.47527	POORLY CHARACTERIZED
	group_3496	2.2759	48	1.18785	POORLY CHARACTERIZED
	group_3519	30.6909	53	9.66824	POORLY CHARACTERIZED
	group_3523	31.2896	54	9.92187	POORLY CHARACTERIZED
	group_3534	1.4091	53	36.1667	POORLY CHARACTERIZED
	group_3542	1.5595	50	8.40361	POORLY CHARACTERIZED
	group_3552	3.5985	49	1.05517	POORLY CHARACTERIZED
	group_3631	2.0097	45	61.5414	POORLY CHARACTERIZED
	group_3645	30.0497	51	9.68834	POORLY CHARACTERIZED
	group_3652	1.1045	51	9.60349	POORLY CHARACTERIZED
	group_3659	1.2418	46	15.5026	POORLY CHARACTERIZED
	group_3676	24.8554	52	9.88217	POORLY CHARACTERIZED
	group_3689	1.5891	64	2.60701	POORLY CHARACTERIZED
	group_3690	17.5659	64	1.71604	POORLY CHARACTERIZED
	group_3748	1.5814	38	124.912	POORLY CHARACTERIZED
	group_3755	1.0051	58	20.3283	POORLY CHARACTERIZED
	group_3775	12.1724	64	9.89421	POORLY CHARACTERIZED
	group_3892	4.904	50	5.58711	POORLY CHARACTERIZED
	group_3907	1.4929	54	21.1053	POORLY CHARACTERIZED
	group_3969	16.9119	69	9.71668	POORLY CHARACTERIZED
	group_3981	1.1698	48	9.01817	POORLY CHARACTERIZED
	group_4002	1.2604	50	14.2952	POORLY CHARACTERIZED
	group_4007	24.1669	55	9.41089	POORLY CHARACTERIZED
	group_401	1.1524	56	10.6545	POORLY CHARACTERIZED
	group_4062	1.2546	49	1.72824	POORLY CHARACTERIZED
	group_4077	33.3398	61	9.63648	POORLY CHARACTERIZED
	group_4118	25.4955	42	9.82838	POORLY CHARACTERIZED
	group_4154	33.989	51	9.85395	POORLY CHARACTERIZED
	group_4224	2.2864	64	5.20834	POORLY CHARACTERIZED
	group_4267	1.513	54	2.37964	POORLY CHARACTERIZED
	group_4269	3.1647	52	3.16991	POORLY CHARACTERIZED
	group_4289	1.2592	52	9.5467	POORLY CHARACTERIZED
	group_4303	1.707	59	2.75326	POORLY CHARACTERIZED
	group_4347	1.3201	65	2.22813	POORLY CHARACTERIZED
	group_4349	21.8103	37	9.79958	POORLY CHARACTERIZED
	group_4360	2.3485	54	2.28039	POORLY CHARACTERIZED
	group_4372	12.7502	57	9.57306	POORLY CHARACTERIZED
	group_4420	22.1094	42	2.43737	POORLY CHARACTERIZED
	group_4452	21.2692	40	9.72015	POORLY CHARACTERIZED
	group_4460	19.9499	45	9.46983	POORLY CHARACTERIZED
	group_4467	1.2521	53	1.6814	POORLY CHARACTERIZED
	group_4479	1.4751	49	8.52779	POORLY CHARACTERIZED
	group_4520	1.0828	60	7.64326	POORLY CHARACTERIZED
	group_4543	34.6016	63	9.50333	POORLY CHARACTERIZED
	group_4548	1.1033	50	2.08424	POORLY CHARACTERIZED
	group_4551	1.557	53	27.1513	POORLY CHARACTERIZED
	group_4553	1.5833	41	3.30512	POORLY CHARACTERIZED
	group_4569	1.1201	46	86.0865	POORLY CHARACTERIZED
	group_4571	31.1141	51	9.65267	POORLY CHARACTERIZED
	group_4597	19.2509	52	9.81419	POORLY CHARACTERIZED
	group_4633	1.3767	48	46.8914	POORLY CHARACTERIZED
	group_4634	8.3852	46	1.54485	POORLY CHARACTERIZED
	group_4647	1.2859	56	42.8906	POORLY CHARACTERIZED
	group_4652	2.3696	62	3.30022	POORLY CHARACTERIZED
	group_4653	1.0217	58	4.52617	POORLY CHARACTERIZED
	group_4666	21.9013	53	16.4467	POORLY CHARACTERIZED
	group_4667	14.0407	53	9.88197	POORLY CHARACTERIZED
	group_4678	14.9854	45	9.84939	POORLY CHARACTERIZED
	group_4689	15.4917	53	9.06703	POORLY CHARACTERIZED
	group_4692	1.2113	42	0.893366	POORLY CHARACTERIZED
	group_4697	23.6515	42	4.79744	POORLY CHARACTERIZED
	group_4761	29.3308	55	9.32523	POORLY CHARACTERIZED
	group_4762	22.2316	51	9.91206	POORLY CHARACTERIZED
	group_4776	14.239	43	9.84673	POORLY CHARACTERIZED
	group_4784	11.5851	49	9.18126	POORLY CHARACTERIZED
	group_4792	35.3846	28	9.82798	POORLY CHARACTERIZED
	group_4805	1.1562	55	9.29396	POORLY CHARACTERIZED
	group_4808	24.7511	55	9.55061	POORLY CHARACTERIZED
	group_4817	33.6699	57	8.86766	POORLY CHARACTERIZED
	group_4832	19.9253	51	9.66212	POORLY CHARACTERIZED
	group_4864	1.4736	52	9.79806	POORLY CHARACTERIZED
	group_4885	2.344	53	8.29717	POORLY CHARACTERIZED
	group_4886	2.1457	57	2.57846	POORLY CHARACTERIZED
	group_4925	13.6148	60	9.92903	POORLY CHARACTERIZED
	group_4940	1.5619	28	56.6178	POORLY CHARACTERIZED
	group_4949	1.6363	47	3.33978	POORLY CHARACTERIZED
	group_4950	28.1445	46	2.04149	POORLY CHARACTERIZED
	group_4951	1.0587	55	3.35208	POORLY CHARACTERIZED
	group_4954	20.195	55	9.89106	POORLY CHARACTERIZED
	group_4955	14.1012	55	9.89657	POORLY CHARACTERIZED
	group_4956	9.1588	56	10.2632	POORLY CHARACTERIZED
	group_4957	33.527	55	10.1473	POORLY CHARACTERIZED
	group_4960	1.0078	66	1.82273	POORLY CHARACTERIZED
	group_4961	1.0103	65	1.79279	POORLY CHARACTERIZED
	group_4962	1.0109	66	1.82276	POORLY CHARACTERIZED
	group_4964	1.0095	66	1.8227	POORLY CHARACTERIZED
	group_4977	11.1905	53	9.92198	POORLY CHARACTERIZED
	group_4979	2.0659	66	1.6886	POORLY CHARACTERIZED
	group_4987	21.1799	59	14.379	POORLY CHARACTERIZED
	group_5004	1.677	55	2.83936	POORLY CHARACTERIZED
	group_5025	1.5835	56	3.34123	POORLY CHARACTERIZED
	group_5029	31.0832	50	9.84318	POORLY CHARACTERIZED
	group_5032	10.5906	51	9.90144	POORLY CHARACTERIZED
	group_5071	10.6678	45	9.83237	POORLY CHARACTERIZED
	group_5083	1.4549	36	1.23681	POORLY CHARACTERIZED
	group_5085	2.6934	45	8.95004	POORLY CHARACTERIZED
	group_5086	28.1941	58	1.55408	POORLY CHARACTERIZED
	group_5087	13.3922	36	9.92651	POORLY CHARACTERIZED
	group_5133	1.0114	50	8.75887	POORLY CHARACTERIZED
	group_5165	1.2759	56	9.56017	POORLY CHARACTERIZED
	group_5166	1.8872	52	20.8838	POORLY CHARACTERIZED
	group_5170	1.0672	47	9.44364	POORLY CHARACTERIZED
	group_5171	26.6234	47	9.31592	POORLY CHARACTERIZED
	group_5174	29.1017	53	8.15639	POORLY CHARACTERIZED
	group_5178	5.853	53	80.6985	POORLY CHARACTERIZED
	group_5179	41.124	59	9.70798	POORLY CHARACTERIZED
	group_5186	3.0731	60	15.6454	POORLY CHARACTERIZED
	group_5198	25.177	58	9.93288	POORLY CHARACTERIZED
	group_5199	1.5124	56	9.31833	POORLY CHARACTERIZED
	group_5213	10.2439	60	9.93733	POORLY CHARACTERIZED
	group_5215	27.3766	49	9.7422	POORLY CHARACTERIZED
	group_5216	27.0659	52	9.91933	POORLY CHARACTERIZED
	group_5221	1.0435	55	9.56271	POORLY CHARACTERIZED
	group_5225	1.415	56	2.00911	POORLY CHARACTERIZED
	group_5233	26.1327	56	9.94306	POORLY CHARACTERIZED
	group_5238	14.9637	48	9.74199	POORLY CHARACTERIZED
	group_5239	1.2977	54	42.003	POORLY CHARACTERIZED
	group_5252	20.9409	55	9.49932	POORLY CHARACTERIZED
	group_5257	15.4042	44	9.90316	POORLY CHARACTERIZED
	group_5260	1.146	51	4.084	POORLY CHARACTERIZED
	group_5274	25.857	37	9.90733	POORLY CHARACTERIZED
	group_5276	31.7834	39	9.72871	POORLY CHARACTERIZED
	group_5280	24.4255	59	9.65972	POORLY CHARACTERIZED
	group_5286	28.0978	53	8.63456	POORLY CHARACTERIZED
	group_5302	51.9805	57	2.16536	POORLY CHARACTERIZED
	group_5310	1.6339	47	7.41975	POORLY CHARACTERIZED
	group_5312	41.2138	44	9.46463	POORLY CHARACTERIZED
	group_5319	18.9154	52	9.88652	POORLY CHARACTERIZED
	group_5322	1.7262	54	1.68084	POORLY CHARACTERIZED
	group_5324	22.639	50	9.6165	POORLY CHARACTERIZED
	group_5326	1.166	56	9.41691	POORLY CHARACTERIZED
	group_5333	1.5594	52	5.11762	POORLY CHARACTERIZED
	group_5334	1.1227	52	9.52641	POORLY CHARACTERIZED
	group_5337	1.4069	51	9.52726	POORLY CHARACTERIZED
	group_5339	11.2122	42	8.821	POORLY CHARACTERIZED
	group_5342	16.8135	49	9.93194	POORLY CHARACTERIZED
	group_5362	21.567	71	1.6035	POORLY CHARACTERIZED
	group_5386	13.975	55	9.93254	POORLY CHARACTERIZED
	group_5390	26.2658	56	7.47468	POORLY CHARACTERIZED
	group_5392	20.453	56	9.58836	POORLY CHARACTERIZED
	group_5394	1.3609	66	9.69534	POORLY CHARACTERIZED
	group_5395	1.0115	54	9.60153	POORLY CHARACTERIZED
	group_5396	42.2167	46	9.81161	POORLY CHARACTERIZED
	group_5402	5.5992	46	9.60306	POORLY CHARACTERIZED
	group_5404	23.6201	51	9.11075	POORLY CHARACTERIZED
	group_5408	1.1851	35	2.01015	POORLY CHARACTERIZED
	group_5425	1.0331	52	59.7796	POORLY CHARACTERIZED
	group_5432	53.0998	39	9.93532	POORLY CHARACTERIZED
	group_5442	26.9198	48	9.74971	POORLY CHARACTERIZED
	group_5443	33.0907	41	9.93627	POORLY CHARACTERIZED
	group_5447	1.266	42	3.56574	POORLY CHARACTERIZED
	group_5448	6.2062	40	9.9261	POORLY CHARACTERIZED
	group_5459	2.2264	39	11.269	POORLY CHARACTERIZED
	group_5461	12.5174	48	9.65996	POORLY CHARACTERIZED
	group_5477	1.4771	59	3.51018	POORLY CHARACTERIZED
	group_5481	6.8688	32	9.82906	POORLY CHARACTERIZED
	group_5493	27.5237	54	9.03269	POORLY CHARACTERIZED
	group_5495	1.6313	51	89.5604	POORLY CHARACTERIZED
	group_5501	34.8622	43	9.87187	POORLY CHARACTERIZED
	group_5508	1.1073	33	3.09963	POORLY CHARACTERIZED
	group_5521	20.5718	42	9.09022	POORLY CHARACTERIZED
	group_5523	34.5183	60	9.55004	POORLY CHARACTERIZED
	group_5525	6.3109	40	9.29592	POORLY CHARACTERIZED
	group_5530	7.924	53	9.92512	POORLY CHARACTERIZED
	group_5544	1.4776	50	9.63886	POORLY CHARACTERIZED
	group_5556	1.9648	59	5.22864	POORLY CHARACTERIZED
	group_5561	1.1241	44	1.67723	POORLY CHARACTERIZED
	group_5569	1.1551	58	9.95481	POORLY CHARACTERIZED
	group_5571	1.3411	52	1.50556	POORLY CHARACTERIZED
	group_5575	1.6972	56	27.213	POORLY CHARACTERIZED
	group_5576	1.4146	52	16.7495	POORLY CHARACTERIZED
	group_5581	39.4633	55	10.2249	POORLY CHARACTERIZED
	group_5592	12.7734	54	9.5857	POORLY CHARACTERIZED
	group_5597	1.2227	55	3.31795	POORLY CHARACTERIZED
	group_5599	25.5857	58	9.4823	POORLY CHARACTERIZED
	group_5606	9.7512	62	9.92872	POORLY CHARACTERIZED
	group_5622	28.0901	54	9.58919	POORLY CHARACTERIZED
	group_5625	28.8328	51	9.42821	POORLY CHARACTERIZED
	group_5630	9.8778	53	9.83842	POORLY CHARACTERIZED
	group_5631	17.3478	50	9.93147	POORLY CHARACTERIZED
	group_5634	1.5746	45	23.8259	POORLY CHARACTERIZED
	group_5635	35.6195	53	9.84157	POORLY CHARACTERIZED
	group_5636	31.7565	39	9.94838	POORLY CHARACTERIZED
	group_5640	32.2297	49	9.79151	POORLY CHARACTERIZED
	group_5642	1.1108	53	56.1083	POORLY CHARACTERIZED
	group_5643	27.8056	53	9.8999	POORLY CHARACTERIZED
	group_5645	25.0748	50	2.79116	POORLY CHARACTERIZED
	group_5652	9.541	60	9.83424	POORLY CHARACTERIZED
	group_5657	20.6525	65	9.90513	POORLY CHARACTERIZED
	group_5662	9.1378	49	2.98347	POORLY CHARACTERIZED
	group_5669	30.8372	52	10.2177	POORLY CHARACTERIZED
	group_5677	25.22	38	9.91263	POORLY CHARACTERIZED
	group_5679	14.8153	53	9.89318	POORLY CHARACTERIZED
	group_5689	23.9628	61	10.0072	POORLY CHARACTERIZED
	group_5699	49.1929	45	9.87449	POORLY CHARACTERIZED
	group_5702	38.4497	56	9.82323	POORLY CHARACTERIZED
	group_5705	10.2159	38	9.83872	POORLY CHARACTERIZED
	group_5706	28.6494	60	5.27284	POORLY CHARACTERIZED
	group_5707	1.4054	56	3.73534	POORLY CHARACTERIZED
	group_5726	24.831	41	9.70536	POORLY CHARACTERIZED
	group_5744	30.6282	46	9.89937	POORLY CHARACTERIZED
	group_5754	30.1922	50	2.01623	POORLY CHARACTERIZED
	group_5757	23.2884	37	9.3061	POORLY CHARACTERIZED
	group_5768	1.3371	44	2.79069	POORLY CHARACTERIZED
	group_5772	25.9355	41	9.53789	POORLY CHARACTERIZED
	group_5774	41.2595	59	9.53604	POORLY CHARACTERIZED
	group_5776	159.378	57	9.8001	POORLY CHARACTERIZED
	group_5783	1.0692	48	2.30277	POORLY CHARACTERIZED
	group_5799	52.8079	60	9.83373	POORLY CHARACTERIZED
	group_5825	1.8288	46	1.8042	POORLY CHARACTERIZED
	group_5832	26.3341	48	10.0667	POORLY CHARACTERIZED
	group_5838	10.0082	59	9.81086	POORLY CHARACTERIZED
	group_5842	26.5733	37	2.28653	POORLY CHARACTERIZED
	group_5845	1.3306	44	1.79641	POORLY CHARACTERIZED
	group_5852	16.7764	58	9.83793	POORLY CHARACTERIZED
	group_5885	5.9157	47	9.09054	POORLY CHARACTERIZED
	group_5893	22.119	54	9.66824	POORLY CHARACTERIZED
	group_5897	1.0679	50	9.87769	POORLY CHARACTERIZED
	group_5902	1.528	59	5.18839	POORLY CHARACTERIZED
	group_5909	26.2199	51	11.3246	POORLY CHARACTERIZED
	group_5924	29.7613	37	9.74739	POORLY CHARACTERIZED
	group_5954	8.3076	53	9.92458	POORLY CHARACTERIZED
	group_5958	34.8802	58	9.42618	POORLY CHARACTERIZED
	group_5960	31.6344	64	9.90769	POORLY CHARACTERIZED
	group_6003	43.843	42	9.78282	POORLY CHARACTERIZED
	group_6007	28.2495	62	9.49774	POORLY CHARACTERIZED
	group_6042	15.0849	43	9.92787	POORLY CHARACTERIZED
	group_6047	23.0015	42	9.77555	POORLY CHARACTERIZED
	group_6061	30.1332	43	9.91735	POORLY CHARACTERIZED
	group_6063	7.0648	46	9.89578	POORLY CHARACTERIZED
	group_6065	43.5725	54	9.7983	POORLY CHARACTERIZED
	group_6068	14.0062	53	9.63203	POORLY CHARACTERIZED
	group_6079	8.6179	51	9.83712	POORLY CHARACTERIZED
	group_6087	22.6548	44	9.94736	POORLY CHARACTERIZED
	group_6094	29.4924	48	9.94075	POORLY CHARACTERIZED
	group_6097	18.7313	52	9.94386	POORLY CHARACTERIZED
	group_6113	44.536	57	9.82062	POORLY CHARACTERIZED
	group_6118	14.8462	51	9.20525	POORLY CHARACTERIZED
	group_6120	59.9605	42	9.60458	POORLY CHARACTERIZED
	group_6142	38.7892	58	9.92977	POORLY CHARACTERIZED
	group_6166	22.2773	50	9.81449	POORLY CHARACTERIZED
	group_6169	35.1651	50	9.94074	POORLY CHARACTERIZED
	group_6203	1.0743	42	9.07958	POORLY CHARACTERIZED
	group_6231	11.5158	54	9.92182	POORLY CHARACTERIZED
	group_6234	13.4177	47	9.36518	POORLY CHARACTERIZED
	group_6235	8.0744	36	9.92612	POORLY CHARACTERIZED
	group_6268	20.5072	61	8.10987	POORLY CHARACTERIZED
	group_6278	14.9369	50	9.92831	POORLY CHARACTERIZED
	group_632	1.2067	31	4.59133	POORLY CHARACTERIZED
	group_6322	1.189	44	9.73005	POORLY CHARACTERIZED
	group_6332	11.7122	52	9.91761	POORLY CHARACTERIZED
	group_6350	11.58	47	9.93731	POORLY CHARACTERIZED
	group_6351	13.0782	42	9.91992	POORLY CHARACTERIZED
	group_6359	29.5518	57	9.30827	POORLY CHARACTERIZED
	group_6363	24.0539	44	9.88078	POORLY CHARACTERIZED
	group_6365	8.4896	58	9.92855	POORLY CHARACTERIZED
	group_6379	26.4847	51	9.89494	POORLY CHARACTERIZED
	group_6397	32.3004	37	9.93249	POORLY CHARACTERIZED
	group_6425	28.7618	44	9.81415	POORLY CHARACTERIZED
	group_6431	5.6799	37	9.94058	POORLY CHARACTERIZED
	group_6434	12.9446	59	10.0163	POORLY CHARACTERIZED
	group_6435	19.5467	41	9.87468	POORLY CHARACTERIZED
	group_6437	7.3374	48	8.98219	POORLY CHARACTERIZED
	group_6468	10000	57	9.8131	POORLY CHARACTERIZED
	group_6469	49.4636	57	9.59305	POORLY CHARACTERIZED
	group_6494	26.2669	43	3.8723	POORLY CHARACTERIZED
	group_6499	30.683	52	9.93201	POORLY CHARACTERIZED
	group_6574	5.6495	58	9.92886	POORLY CHARACTERIZED
	group_6624	6.6683	50	10.5612	POORLY CHARACTERIZED
	group_6644	44.8616	56	9.84429	POORLY CHARACTERIZED
	group_665	1.2647	68	10.9363	POORLY CHARACTERIZED
	group_672	1.5094	68	4.16435	POORLY CHARACTERIZED
	group_698	2.0999	66	3.32926	POORLY CHARACTERIZED
	group_6999	7.3102	55	9.93666	POORLY CHARACTERIZED
	group_700	1.3902	26	3.10327	POORLY CHARACTERIZED
	group_7109	8.8757	40	16.2729	POORLY CHARACTERIZED
	group_7117	10.6426	41	9.93218	POORLY CHARACTERIZED
	group_712	31.2275	45	9.19453	POORLY CHARACTERIZED
	group_7144	18.3298	45	9.86337	POORLY CHARACTERIZED
	group_7154	82.8154	41	9.91492	POORLY CHARACTERIZED
	group_7170	11.3892	51	21.9059	POORLY CHARACTERIZED
	group_7391	37.2602	57	9.93134	POORLY CHARACTERIZED
	group_7475	17.2032	52	9.89588	POORLY CHARACTERIZED
	group_7590	34.7535	55	9.90885	POORLY CHARACTERIZED
	group_7786	28.5804	47	9.93017	POORLY CHARACTERIZED
	group_7796	13.0802	47	9.50949	POORLY CHARACTERIZED
	group_8178	41.9995	54	9.90158	POORLY CHARACTERIZED
	group_831	1.2169	44	13.3666	POORLY CHARACTERIZED
	group_832	1.4301	47	10.461	POORLY CHARACTERIZED
	group_8938	14.8275	53	9.89716	POORLY CHARACTERIZED
	group_8939	1.4191	52	9.92514	POORLY CHARACTERIZED
	group_8962	31.5914	48	9.84186	POORLY CHARACTERIZED
	group_8988	14.4806	49	9.76636	POORLY CHARACTERIZED
	group_8989	15.0449	49	9.76635	POORLY CHARACTERIZED
	group_8993	12.0754	46	9.89632	POORLY CHARACTERIZED
	group_9023	8.6078	45	9.89175	POORLY CHARACTERIZED
	group_9027	23.5416	55	9.91666	POORLY CHARACTERIZED
	group_9029	13.957	53	9.87857	POORLY CHARACTERIZED
	group_9040	23.937	58	9.71855	POORLY CHARACTERIZED
	group_9045	15.0736	45	9.83873	POORLY CHARACTERIZED
	group_9075	29.7284	48	10.6562	POORLY CHARACTERIZED
	group_9077	1.0204	51	9.75371	POORLY CHARACTERIZED
	group_9083	15.8775	62	9.99861	POORLY CHARACTERIZED
	group_9086	9.5606	47	9.88561	POORLY CHARACTERIZED
	group_9088	29.7619	55	9.79884	POORLY CHARACTERIZED
	group_9090	1.1221	51	9.55391	POORLY CHARACTERIZED
	group_9093	1.1091	48	10.3831	POORLY CHARACTERIZED
	group_9118	24.4564	47	9.75612	POORLY CHARACTERIZED
	group_9133	27.6853	57	9.93714	POORLY CHARACTERIZED
	group_9139	24.5264	58	9.66639	POORLY CHARACTERIZED
	group_9160	30.3995	49	8.46378	POORLY CHARACTERIZED
	group_9161	27.605	57	9.5964	POORLY CHARACTERIZED
	group_9169	1.0231	39	9.61245	POORLY CHARACTERIZED
	group_9181	82.7397	63	9.92852	POORLY CHARACTERIZED
	group_9182	27.8942	63	9.92852	POORLY CHARACTERIZED
	group_9186	43.8881	63	9.92852	POORLY CHARACTERIZED
	group_9187	34.9571	63	9.85982	POORLY CHARACTERIZED
	group_9188	33.325	63	9.92853	POORLY CHARACTERIZED
	group_9200	1.0029	59	16.7766	POORLY CHARACTERIZED
	group_9229	32.1224	39	9.88045	POORLY CHARACTERIZED
	group_9231	8.6976	47	9.94421	POORLY CHARACTERIZED
	group_9232	33.5357	48	9.9157	POORLY CHARACTERIZED
	group_9238	21.0049	47	9.71329	POORLY CHARACTERIZED
	group_9240	32.096	36	9.92891	POORLY CHARACTERIZED
	group_9257	43.2176	56	9.32225	POORLY CHARACTERIZED
	group_9260	32.7869	48	9.89739	POORLY CHARACTERIZED
	group_9275	15.1279	48	9.82173	POORLY CHARACTERIZED
	group_9277	13.7692	44	9.94726	POORLY CHARACTERIZED
	group_9288	8.5019	54	9.94332	POORLY CHARACTERIZED
	group_9316	27.982	50	9.78026	POORLY CHARACTERIZED
	group_9353	2.0363	47	8.53829	POORLY CHARACTERIZED
	group_9356	9.9152	48	9.90803	POORLY CHARACTERIZED
	group_9364	13.7633	54	9.94761	POORLY CHARACTERIZED
	group_941	1.0479	56	5.99914	POORLY CHARACTERIZED
	grpE	5.7648	53	9.87345	POORLY CHARACTERIZED
	hcaB	27.9584	51	5.90841	POORLY CHARACTERIZED
	lifO	43.2785	52	9.94128	POORLY CHARACTERIZED
	lptE	1.4826	52	9.36307	POORLY CHARACTERIZED
	mdtA_2	1.1822	55	0.661552	POORLY CHARACTERIZED
	mepM	1.3901	49	8.554	POORLY CHARACTERIZED
	mltF	1.1372	54	19.805	POORLY CHARACTERIZED
	nlpD	15.6266	55	9.85378	POORLY CHARACTERIZED
	nrdE1	1.212	52	8.88553	POORLY CHARACTERIZED
	pdaA	1.5053	56	6.60546	POORLY CHARACTERIZED
	phoP_1	1.8052	42	25.9312	POORLY CHARACTERIZED
	queE	25.5482	48	9.86426	POORLY CHARACTERIZED
	rlmD_2	1.0049	32	43.5489	POORLY CHARACTERIZED
	rplY	1.1974	49	9.0073	POORLY CHARACTERIZED
	rssB_2	1.4263	49	2.27089	POORLY CHARACTERIZED
	rssB_3	33.1086	49	9.8315	POORLY CHARACTERIZED
	rutC	28.201	53	9.91921	POORLY CHARACTERIZED
	shlB	1.2794	55	7.85908	POORLY CHARACTERIZED
	sodB	9.1261	50	9.86669	POORLY CHARACTERIZED
	ssuD	1.7621	54	2.6868	POORLY CHARACTERIZED
	trpR	1.7495	35	3.86827	POORLY CHARACTERIZED
	ybaB	18.0613	49	9.92376	POORLY CHARACTERIZED
	yceI_2	3.5041	52	82.3931	POORLY CHARACTERIZED
	yoaJ	15.1589	51	9.80798	POORLY CHARACTERIZED

## Sheet: subsp. pauca
	Table S7. Subsp pauca genes with dN/dS>1
	gene	dN/dS	GC	r/m	COG class
	ccmE	2.6769	56	10	CELLULAR PROCESSES AND SIGNALING
	clp	2.2532	52	8.93297	CELLULAR PROCESSES AND SIGNALING
	clpB	27.1958	51	14.8869	CELLULAR PROCESSES AND SIGNALING
	hflK	27.2116	55	25.8867	CELLULAR PROCESSES AND SIGNALING
	hslO	1.3127	49	9.41461	CELLULAR PROCESSES AND SIGNALING
	hslV	33.2795	54	3.56065	CELLULAR PROCESSES AND SIGNALING
	mreD	1.4786	54	10	CELLULAR PROCESSES AND SIGNALING
	sspA	24.5885	48	9.4539	CELLULAR PROCESSES AND SIGNALING
	ttcA	31.2747	54	6.04048	CELLULAR PROCESSES AND SIGNALING
	ybbJ	1.0909	52	9.61676	CELLULAR PROCESSES AND SIGNALING
	ybbN	1.1568	53	3.65317	CELLULAR PROCESSES AND SIGNALING
	yiaD	11.4193	53	9.44895	CELLULAR PROCESSES AND SIGNALING
	aspS	1.1196	52	5.41764	INFORMATION STORAGE AND PROCESSING
	cspA	18.7081	46	10	INFORMATION STORAGE AND PROCESSING
	cysS	2.3124	58	8.9773	INFORMATION STORAGE AND PROCESSING
	dnaG_1	1.0088	56	4.55237	INFORMATION STORAGE AND PROCESSING
	dnaQ	2.6067	51	21.7973	INFORMATION STORAGE AND PROCESSING
	fis	1.5109	51	10	INFORMATION STORAGE AND PROCESSING
	frr	16.3073	50	9.69559	INFORMATION STORAGE AND PROCESSING
	nfi	9.1949	51	12.4272	INFORMATION STORAGE AND PROCESSING
	tufA_1	1.2824	51	8.78349	INFORMATION STORAGE AND PROCESSING
	tufA_2	1.2704	51	9.15247	INFORMATION STORAGE AND PROCESSING
	tyrS	1.7404	47	8.87256	INFORMATION STORAGE AND PROCESSING
	yqgF	2.7921	60	9.89724	INFORMATION STORAGE AND PROCESSING
	alx	36.3367	51	9.12687	METABOLISM
	aroG	33.1892	51	2.3002	METABOLISM
	aroQ1	18.473	53	9.90057	METABOLISM
	atpH_1	1.2194	52	10	METABOLISM
	coq7	30.0104	53	9.8495	METABOLISM
	dut	25.89	54	28.174	METABOLISM
	eda	23.4401	57	9.35571	METABOLISM
	estB	29.894	53	10.0922	METABOLISM
	fabA	1.0146	52	9.39794	METABOLISM
	fabD	1.2568	56	4.11109	METABOLISM
	fdxA	31.3097	52	5.24665	METABOLISM
	folD	24.5268	55	9.3054	METABOLISM
	folE	6.958	52	10.1826	METABOLISM
	gapA	1.5115	50	1.51329	METABOLISM
	gpmA	6.7309	46	9.48151	METABOLISM
	group_4598	7.9018	39	10	METABOLISM
	ispD	27.4142	58	9.44946	METABOLISM
	ispE	2.86	54	8.77912	METABOLISM
	metF	1.0327	57	3.18346	METABOLISM
	metK	1.4184	48	35.9187	METABOLISM
	mlaC	1.1425	51	10	METABOLISM
	nadA	2.1148	49	7.28879	METABOLISM
	noc	1.5719	45	9.63832	METABOLISM
	nuoN	27.7358	51	8.44125	METABOLISM
	pepP	5.8144	54	8.82154	METABOLISM
	pncA	34.3143	54	6.69791	METABOLISM
	pncB2	1.5639	51	0.894948	METABOLISM
	psd	1.1169	54	2.07723	METABOLISM
	purC	26.1859	55	1.77205	METABOLISM
	purE	26.3834	56	18.6505	METABOLISM
	purU	1.4579	50	2.20058	METABOLISM
	pyrF	1.0922	54	9.62307	METABOLISM
	queD	14.5228	49	2.67197	METABOLISM
	sbp	9.6027	54	5.34464	METABOLISM
	tcdA	1.3232	49	9.83407	METABOLISM
	ubiA	1.2217	53	8.10989	METABOLISM
	ydjA	18.4153	55	1.25211	METABOLISM
	zur	28.0992	55	8.6417	METABOLISM
	acuI	34.5917	54	9.4359	MULTIPLE CATEGORIES
	tagH	1.1848	49	8.9722	MULTIPLE CATEGORIES
	trxA_2	15.5498	46	9.91981	MULTIPLE CATEGORIES
	alkA	1.4115	55	9.58945	POORLY CHARACTERIZED
	argB	2.727	55	4.24427	POORLY CHARACTERIZED
	bamD	1.5387	54	11.7904	POORLY CHARACTERIZED
	btaE	1.1093	51	10.4467	POORLY CHARACTERIZED
	btuB_2	7.5847	57	2.19305	POORLY CHARACTERIZED
	calA	1.8735	56	8.23376	POORLY CHARACTERIZED
	cpoB	33.9661	47	9.52506	POORLY CHARACTERIZED
	crcB	27.6525	51	9.81808	POORLY CHARACTERIZED
	dapB	1.9166	59	55.1918	POORLY CHARACTERIZED
	dksA	1.0006	50	9.15606	POORLY CHARACTERIZED
	entS	1.4171	56	9.43644	POORLY CHARACTERIZED
	fadB	1.3218	48	8.10247	POORLY CHARACTERIZED
	ftsL	27.2955	52	9.50941	POORLY CHARACTERIZED
	glpE_1	1.0117	60	9.21533	POORLY CHARACTERIZED
	group_1049	1.2224	53	17.7885	POORLY CHARACTERIZED
	group_1144	5.8787	61	9.78995	POORLY CHARACTERIZED
	group_1236	8.4763	41	31.409	POORLY CHARACTERIZED
	group_1268	1.7283	63	11.2625	POORLY CHARACTERIZED
	group_1279	1.1522	54	37.3904	POORLY CHARACTERIZED
	group_1308	1.8128	53	4.8133	POORLY CHARACTERIZED
	group_1367	2.4277	69	28.6359	POORLY CHARACTERIZED
	group_1368	3.4479	69	8.52663	POORLY CHARACTERIZED
	group_1431	3.0725	55	10	POORLY CHARACTERIZED
	group_1506	2.1448	70	18.8519	POORLY CHARACTERIZED
	group_1507	2.2683	70	23.4219	POORLY CHARACTERIZED
	group_1560	1.1231	55	33.7119	POORLY CHARACTERIZED
	group_1672	20.1965	63	6.82644	POORLY CHARACTERIZED
	group_1684	7.6699	53	2.87723	POORLY CHARACTERIZED
	group_1733	1.2271	44	44.2429	POORLY CHARACTERIZED
	group_1902	1.2482	57	3.79884	POORLY CHARACTERIZED
	group_1986	13.1498	53	17.1978	POORLY CHARACTERIZED
	group_2162	18.4116	35	22.1483	POORLY CHARACTERIZED
	group_2201	24.7645	58	4.65991	POORLY CHARACTERIZED
	group_2205	2.4852	60	1.25756	POORLY CHARACTERIZED
	group_2211	10.6666	54	5.89527	POORLY CHARACTERIZED
	group_2254	14.6859	45	9.61158	POORLY CHARACTERIZED
	group_2315	9.961	50	2.98596	POORLY CHARACTERIZED
	group_2327	1.2002	45	24.6596	POORLY CHARACTERIZED
	group_2396	2.0594	56	7.78386	POORLY CHARACTERIZED
	group_2421	1.0923	68	5.57144	POORLY CHARACTERIZED
	group_2429	1.383	68	9.59002	POORLY CHARACTERIZED
	group_2527	4.6335	71	8.6153	POORLY CHARACTERIZED
	group_2708	29.6769	58	38.0201	POORLY CHARACTERIZED
	group_2724	36.1	56	8.33129	POORLY CHARACTERIZED
	group_2731	2.3813	50	4.62438	POORLY CHARACTERIZED
	group_2751	33.5563	43	9.72521	POORLY CHARACTERIZED
	group_2849	1.3648	66	9.78098	POORLY CHARACTERIZED
	group_2902	2.1947	55	4.13328	POORLY CHARACTERIZED
	group_2905	25.5394	60	49.8922	POORLY CHARACTERIZED
	group_2911	1.5518	47	18.7127	POORLY CHARACTERIZED
	group_2916	31.7107	55	0.680774	POORLY CHARACTERIZED
	group_2964	28.6971	31	9.74686	POORLY CHARACTERIZED
	group_2968	27.9317	31	21.859	POORLY CHARACTERIZED
	group_3028	21.9361	37	1.53382	POORLY CHARACTERIZED
	group_303	4.2394	64	83.065	POORLY CHARACTERIZED
	group_3101	1.0182	53	9.05189	POORLY CHARACTERIZED
	group_3191	33.5101	50	3.45063	POORLY CHARACTERIZED
	group_3205	15.5954	37	3.308	POORLY CHARACTERIZED
	group_3209	22.6632	44	1.92688	POORLY CHARACTERIZED
	group_3223	1.2386	54	78.2568	POORLY CHARACTERIZED
	group_3271	22.3226	39	54.5358	POORLY CHARACTERIZED
	group_3385	29.7764	53	8.84901	POORLY CHARACTERIZED
	group_3405	23.0875	48	34.6234	POORLY CHARACTERIZED
	group_3409	33.9823	52	9.28703	POORLY CHARACTERIZED
	group_3426	15.355	59	9.80008	POORLY CHARACTERIZED
	group_3468	63.9121	46	44.2623	POORLY CHARACTERIZED
	group_3483	44.6326	43	5.23653	POORLY CHARACTERIZED
	group_3530	1.2378	65	10.1738	POORLY CHARACTERIZED
	group_3538	9.1283	42	9.30386	POORLY CHARACTERIZED
	group_3625	56.391	46	31.8783	POORLY CHARACTERIZED
	group_3633	15.6395	51	34.2888	POORLY CHARACTERIZED
	group_3701	14.0137	63	36.1648	POORLY CHARACTERIZED
	group_3727	1.4275	50	5.44143	POORLY CHARACTERIZED
	group_3814	28.1263	54	6.2404	POORLY CHARACTERIZED
	group_3827	1.0517	58	1.98645	POORLY CHARACTERIZED
	group_3828	27.5208	57	9.38193	POORLY CHARACTERIZED
	group_3832	9.1628	48	21.6601	POORLY CHARACTERIZED
	group_3840	23.091	48	1.70143	POORLY CHARACTERIZED
	group_3845	2.2363	39	40.4308	POORLY CHARACTERIZED
	group_3918	2.2879	49	2.39415	POORLY CHARACTERIZED
	group_3997	25.1803	55	9.39337	POORLY CHARACTERIZED
	group_4015	1.3504	45	10	POORLY CHARACTERIZED
	group_4037	1.2716	45	39.6964	POORLY CHARACTERIZED
	group_4051	12.0126	56	10	POORLY CHARACTERIZED
	group_4053	1.2181	52	25.1292	POORLY CHARACTERIZED
	group_4068	1.171	49	9.14377	POORLY CHARACTERIZED
	group_4103	25.235	63	34.0193	POORLY CHARACTERIZED
	group_4161	11.0183	48	2.37742	POORLY CHARACTERIZED
	group_4167	27.8724	46	2.06452	POORLY CHARACTERIZED
	group_4177	26.1328	54	12.0401	POORLY CHARACTERIZED
	group_4216	2.5172	47	10	POORLY CHARACTERIZED
	group_4225	15.8388	47	61.8587	POORLY CHARACTERIZED
	group_4229	26.8354	57	8.98125	POORLY CHARACTERIZED
	group_4350	23.0529	53	15.9522	POORLY CHARACTERIZED
	group_4441	27.7282	50	9.76486	POORLY CHARACTERIZED
	group_4497	1.0484	56	9.46054	POORLY CHARACTERIZED
	group_4505	34.0625	40	10	POORLY CHARACTERIZED
	group_4552	24.5945	58	8.73489	POORLY CHARACTERIZED
	group_4585	30.1503	50	9.5336	POORLY CHARACTERIZED
	group_4586	9.5014	47	9.48748	POORLY CHARACTERIZED
	group_4589	22.7106	54	3.37681	POORLY CHARACTERIZED
	group_4652	21.6084	55	3.30022	POORLY CHARACTERIZED
	group_4662	28.2486	57	56.814	POORLY CHARACTERIZED
	group_4669	10.3871	54	9.66835	POORLY CHARACTERIZED
	group_4674	36.3892	51	10	POORLY CHARACTERIZED
	group_4677	50.9815	53	4.32479	POORLY CHARACTERIZED
	group_4784	28.8856	58	9.18126	POORLY CHARACTERIZED
	group_4787	10.6761	49	14.4036	POORLY CHARACTERIZED
	group_4811	38.5132	50	1.51669	POORLY CHARACTERIZED
	group_4837	12.9843	42	11.7002	POORLY CHARACTERIZED
	group_4840	33.0519	48	43.9003	POORLY CHARACTERIZED
	group_4862	10.7018	47	3.71797	POORLY CHARACTERIZED
	group_4904	14.1411	54	2.35014	POORLY CHARACTERIZED
	group_4905	12.217	55	3.86005	POORLY CHARACTERIZED
	group_4925	1.1313	65	9.92903	POORLY CHARACTERIZED
	group_4951	37.2048	54	3.35208	POORLY CHARACTERIZED
	group_5029	8.0144	44	9.84318	POORLY CHARACTERIZED
	group_5032	6.3477	37	9.90144	POORLY CHARACTERIZED
	group_5063	9.8929	36	10	POORLY CHARACTERIZED
	group_5117	3.7709	62	9.73279	POORLY CHARACTERIZED
	group_5134	26.6698	46	3.00237	POORLY CHARACTERIZED
	group_5234	11.4983	51	80.1936	POORLY CHARACTERIZED
	group_5331	11.27	54	1.9281	POORLY CHARACTERIZED
	group_5459	21.8368	50	11.269	POORLY CHARACTERIZED
	group_5498	14.4968	53	3.45194	POORLY CHARACTERIZED
	group_5508	31.8457	54	3.09963	POORLY CHARACTERIZED
	group_5543	6.6654	35	2.64728	POORLY CHARACTERIZED
	group_5564	9.1472	43	8.03177	POORLY CHARACTERIZED
	group_5570	28.559	51	5.67015	POORLY CHARACTERIZED
	group_5591	9.4132	48	6.4393	POORLY CHARACTERIZED
	group_5621	1.0488	61	8.98573	POORLY CHARACTERIZED
	group_5629	34.4548	58	11.6063	POORLY CHARACTERIZED
	group_5631	13.4004	48	9.93147	POORLY CHARACTERIZED
	group_5634	13.5247	49	23.8259	POORLY CHARACTERIZED
	group_5654	9.1309	41	9.57459	POORLY CHARACTERIZED
	group_5723	10.8585	52	3.43273	POORLY CHARACTERIZED
	group_573	21.2276	38	2.97543	POORLY CHARACTERIZED
	group_5776	30.6998	57	9.8001	POORLY CHARACTERIZED
	group_613	1.4971	67	82.225	POORLY CHARACTERIZED
	group_873	1.1129	47	16.8864	POORLY CHARACTERIZED
	group_8833	14.5372	46	10	POORLY CHARACTERIZED
	group_9315	27.8108	40	9.3532	POORLY CHARACTERIZED
	hfq	52.2071	47	2.85097	POORLY CHARACTERIZED
	hmp	1.2159	48	4.50417	POORLY CHARACTERIZED
	lptE	1.3362	53	9.36307	POORLY CHARACTERIZED
	mltF	26.0263	54	19.805	POORLY CHARACTERIZED
	mrkD_1	2.0134	51	16.151	POORLY CHARACTERIZED
	oxyR	1.7441	52	9.81704	POORLY CHARACTERIZED
	pgk	2.1359	56	9.23085	POORLY CHARACTERIZED
	phaB	8.6176	55	2.97693	POORLY CHARACTERIZED
	pilE	29.1806	52	7.57207	POORLY CHARACTERIZED
	sasA_1	1.044	56	3.2525	POORLY CHARACTERIZED
	slyA	33.3911	51	38.2767	POORLY CHARACTERIZED
	tamB	16.3356	56	14.8014	POORLY CHARACTERIZED
	tatA	1.3264	56	32.2454	POORLY CHARACTERIZED
	traD	32.753	49	9.91639	POORLY CHARACTERIZED
	trpC	36.1271	51	37.9567	POORLY CHARACTERIZED
	yafQ	1.2663	57	3.65071	POORLY CHARACTERIZED
	yafV	1.1842	53	11.0724	POORLY CHARACTERIZED
	yidD	28.8037	58	10	POORLY CHARACTERIZED
	yqiC	11.7228	42	10	POORLY CHARACTERIZED
	zapA	23.8684	53	20.4218	POORLY CHARACTERIZED

## Sheet: subsp. fastidiosa
	Table S7. Subsp fastidiosa genes with dN/dS>1
	gene	dN/dS	GC	r/m	COG class
	dac	25.1345	40	9.91647	CELLULAR PROCESSES AND SIGNALING
	dacC_1	1.7808	46	2.21135	CELLULAR PROCESSES AND SIGNALING
	group_196	1.0363	58	25.3027	CELLULAR PROCESSES AND SIGNALING
	group_838	1.1246	56	1.73602	CELLULAR PROCESSES AND SIGNALING
	ohrB	29.9253	50	9.69064	CELLULAR PROCESSES AND SIGNALING
	pilA_1	48.2529	50	9.76502	CELLULAR PROCESSES AND SIGNALING
	pilA_2	1.5708	54	8.99868	CELLULAR PROCESSES AND SIGNALING
	smpB	13.7592	53	9.88976	CELLULAR PROCESSES AND SIGNALING
	sufC	18.9964	55	9.66136	CELLULAR PROCESSES AND SIGNALING
	tatA	17.5328	54	9.78418	CELLULAR PROCESSES AND SIGNALING
	tsaB	33.6496	56	1.61317	CELLULAR PROCESSES AND SIGNALING
	yhdE	12.117	57	9.87252	CELLULAR PROCESSES AND SIGNALING
	fis	13.7641	51	9.76316	INFORMATION STORAGE AND PROCESSING
	group_296	2.4678	67	18.1994	INFORMATION STORAGE AND PROCESSING
	group_784	6.5353	50	12.5849	INFORMATION STORAGE AND PROCESSING
	ihfB	10.2722	50	9.92486	INFORMATION STORAGE AND PROCESSING
	map	19.9354	53	9.68984	INFORMATION STORAGE AND PROCESSING
	mprA_1	6.6487	43	9.57576	INFORMATION STORAGE AND PROCESSING
	ogt	1.8377	52	7.86497	INFORMATION STORAGE AND PROCESSING
	rbfA	12.6975	49	9.91354	INFORMATION STORAGE AND PROCESSING
	rnc	1.2004	55	9.4356	INFORMATION STORAGE AND PROCESSING
	rplA	1.0041	44	9.51706	INFORMATION STORAGE AND PROCESSING
	rplV	1.1664	45	1.50175	INFORMATION STORAGE AND PROCESSING
	rpmC	23.6146	41	1.64873	INFORMATION STORAGE AND PROCESSING
	rpsQ	21.1337	39	9.60516	INFORMATION STORAGE AND PROCESSING
	truB	1.2843	52	9.39767	INFORMATION STORAGE AND PROCESSING
	ykgO	8.969	49	9.92443	INFORMATION STORAGE AND PROCESSING
	adk	1.3828	54	9.46538	METABOLISM
	cutC	14.3039	60	9.84956	METABOLISM
	eda	1.1179	56	6.70621	METABOLISM
	fabZ	15.0248	49	9.87249	METABOLISM
	folC	1.6006	52	26.8681	METABOLISM
	group_10277	2.1355	51	6.31617	METABOLISM
	group_1423	24.0478	48	12.9822	METABOLISM
	group_74	2.0378	62	12.9306	METABOLISM
	group_835	29.7485	56	9.34621	METABOLISM
	group_976	6.5638	56	2.64856	METABOLISM
	hflD	29.3893	53	9.41301	METABOLISM
	kdsD	1.1555	55	8.15371	METABOLISM
	panD	34.8391	48	9.73534	METABOLISM
	pdxH	23.5362	55	9.62792	METABOLISM
	purA	1.0373	52	9.53388	METABOLISM
	queD	21.5519	48	9.91611	METABOLISM
	ratA	10.0042	48	9.9102	METABOLISM
	trpG_2	1.0603	37	1.96436	METABOLISM
	yheS	29.5704	54	9.6699	METABOLISM
	btsR	1.3525	50	7.83641	MULTIPLE CATEGORIES
	pgl	25.9025	57	9.12697	MULTIPLE CATEGORIES
	rppH	40.4605	51	8.98015	MULTIPLE CATEGORIES
	aroQ	1.0719	51	8.90357	POORLY CHARACTERIZED
	atpH_2	28.7721	52	9.6389	POORLY CHARACTERIZED
	cmk	1.5227	51	5.56632	POORLY CHARACTERIZED
	dpnA_1	36.9868	58	9.81246	POORLY CHARACTERIZED
	fimA	1.0365	49	9.41463	POORLY CHARACTERIZED
	group_10029	2.5645	59	16.0701	POORLY CHARACTERIZED
	group_10038	13.7362	54	9.92795	POORLY CHARACTERIZED
	group_10079	34.2771	49	9.86584	POORLY CHARACTERIZED
	group_10192	11.2546	49	8.91628	POORLY CHARACTERIZED
	group_10214	27.7556	50	9.17641	POORLY CHARACTERIZED
	group_10264	1.1608	54	9.50166	POORLY CHARACTERIZED
	group_10272	9.0738	49	9.93592	POORLY CHARACTERIZED
	group_10273	35.6814	46	9.92667	POORLY CHARACTERIZED
	group_1035	2.915	45	9.90529	POORLY CHARACTERIZED
	group_1049	1.0165	50	1.75155	POORLY CHARACTERIZED
	group_1053	3.427	49	2.92588	POORLY CHARACTERIZED
	group_1135	1.2489	58	12.9401	POORLY CHARACTERIZED
	group_1140	1.6229	59	34.8254	POORLY CHARACTERIZED
	group_1156	28.8007	53	3.54434	POORLY CHARACTERIZED
	group_1158	33.1571	53	9.98598	POORLY CHARACTERIZED
	group_1187	1.3104	52	2.25427	POORLY CHARACTERIZED
	group_1189	1.2068	32	6.27018	POORLY CHARACTERIZED
	group_1212	2.0415	52	1.44797	POORLY CHARACTERIZED
	group_1214	1.7028	51	2.12739	POORLY CHARACTERIZED
	group_1215	1.0135	52	9.29162	POORLY CHARACTERIZED
	group_1216	1.1666	51	2.29628	POORLY CHARACTERIZED
	group_1230	1.0556	60	2.90715	POORLY CHARACTERIZED
	group_1246	1.0517	53	6.29623	POORLY CHARACTERIZED
	group_1266	1.1836	50	3.8459	POORLY CHARACTERIZED
	group_1288	28.9242	41	1.97217	POORLY CHARACTERIZED
	group_1299	2.1515	63	8.07699	POORLY CHARACTERIZED
	group_1303	10.2285	61	9.77664	POORLY CHARACTERIZED
	group_1306	182.569	61	9.77664	POORLY CHARACTERIZED
	group_1311	10.2441	61	9.77664	POORLY CHARACTERIZED
	group_1320	1.1013	36	26.465	POORLY CHARACTERIZED
	group_1321	1.9894	51	1.85132	POORLY CHARACTERIZED
	group_1323	2.1284	52	1.68622	POORLY CHARACTERIZED
	group_1334	1.1682	64	17.5795	POORLY CHARACTERIZED
	group_1335	1.0407	41	6.71671	POORLY CHARACTERIZED
	group_1378	1.2151	49	10.068	POORLY CHARACTERIZED
	group_1389	1.1528	38	26.3281	POORLY CHARACTERIZED
	group_1401	1.0013	43	1.29498	POORLY CHARACTERIZED
	group_1447	1.5579	56	1.63986	POORLY CHARACTERIZED
	group_1448	1.4528	64	2.54517	POORLY CHARACTERIZED
	group_1450	1.106	65	1.39479	POORLY CHARACTERIZED
	group_1502	10.1944	40	9.7838	POORLY CHARACTERIZED
	group_1520	3.5052	56	6.54118	POORLY CHARACTERIZED
	group_1521	2.3963	56	4.14727	POORLY CHARACTERIZED
	group_1532	26.2757	58	5.65036	POORLY CHARACTERIZED
	group_1570	2.6199	56	1.68759	POORLY CHARACTERIZED
	group_1572	4.6504	53	3.12592	POORLY CHARACTERIZED
	group_1585	1.3287	63	8.0858	POORLY CHARACTERIZED
	group_1658	22.9372	37	8.01651	POORLY CHARACTERIZED
	group_1734	1.4737	47	50.8799	POORLY CHARACTERIZED
	group_1750	1.8105	50	8.5443	POORLY CHARACTERIZED
	group_1762	1.9029	55	9.76843	POORLY CHARACTERIZED
	group_1767	3.3721	61	40.0771	POORLY CHARACTERIZED
	group_1769	1.3881	54	4.07055	POORLY CHARACTERIZED
	group_1777	1.2075	55	2.29585	POORLY CHARACTERIZED
	group_1786	1.9872	67	8.95279	POORLY CHARACTERIZED
	group_1788	1.1557	67	2.37358	POORLY CHARACTERIZED
	group_1789	1.1735	67	2.37349	POORLY CHARACTERIZED
	group_1792	1.1372	67	2.3732	POORLY CHARACTERIZED
	group_1795	1.1049	67	2.37157	POORLY CHARACTERIZED
	group_1796	1.1456	67	2.37322	POORLY CHARACTERIZED
	group_1802	1.9962	42	30.2575	POORLY CHARACTERIZED
	group_1804	1.8466	42	19.3973	POORLY CHARACTERIZED
	group_1811	20.1008	40	8.65889	POORLY CHARACTERIZED
	group_1820	23.8342	59	9.85275	POORLY CHARACTERIZED
	group_1825	1.3372	52	12.2659	POORLY CHARACTERIZED
	group_191	1.0811	66	46.7315	POORLY CHARACTERIZED
	group_1924	11.8914	43	27.4364	POORLY CHARACTERIZED
	group_1939	2.9733	53	1.47362	POORLY CHARACTERIZED
	group_1945	1.5707	58	6.76433	POORLY CHARACTERIZED
	group_1948	8.025	27	9.64659	POORLY CHARACTERIZED
	group_1978	28.9005	56	2.0535	POORLY CHARACTERIZED
	group_1980	28.3547	53	15.3601	POORLY CHARACTERIZED
	group_1981	12.5685	53	9.84947	POORLY CHARACTERIZED
	group_1989	2.0701	40	19.4113	POORLY CHARACTERIZED
	group_1991	25.1774	41	9.78394	POORLY CHARACTERIZED
	group_2025	24.1538	39	9.6092	POORLY CHARACTERIZED
	group_2062	18.4247	43	9.78702	POORLY CHARACTERIZED
	group_2072	1.1228	54	29.0031	POORLY CHARACTERIZED
	group_208	1.1667	52	59.3443	POORLY CHARACTERIZED
	group_2095	103.049	52	9.08745	POORLY CHARACTERIZED
	group_2096	29.0012	52	7.15673	POORLY CHARACTERIZED
	group_2115	1.6827	28	9.03134	POORLY CHARACTERIZED
	group_2116	4.4442	61	2.33905	POORLY CHARACTERIZED
	group_2130	1.8056	35	2.2523	POORLY CHARACTERIZED
	group_2144	20.8646	50	2.38804	POORLY CHARACTERIZED
	group_2147	1.05	63	1.88913	POORLY CHARACTERIZED
	group_2148	23.0037	58	9.85688	POORLY CHARACTERIZED
	group_2159	28.8924	49	9.70623	POORLY CHARACTERIZED
	group_2214	34.3159	60	9.88008	POORLY CHARACTERIZED
	group_2217	64.5307	60	9.88008	POORLY CHARACTERIZED
	group_2221	1.6768	60	6.70949	POORLY CHARACTERIZED
	group_2224	1.2987	61	6.89566	POORLY CHARACTERIZED
	group_2227	2.2234	60	9.72744	POORLY CHARACTERIZED
	group_2238	2.1	63	1.12596	POORLY CHARACTERIZED
	group_2249	26.4033	53	4.35125	POORLY CHARACTERIZED
	group_2250	32.9693	59	7.85673	POORLY CHARACTERIZED
	group_2274	1.6217	19	14.0412	POORLY CHARACTERIZED
	group_2277	1.5004	44	8.8654	POORLY CHARACTERIZED
	group_2290	1.1504	47	1.21276	POORLY CHARACTERIZED
	group_230	25.5149	63	9.63917	POORLY CHARACTERIZED
	group_2311	26.666	44	9.94159	POORLY CHARACTERIZED
	group_2315	1.1784	53	4.64551	POORLY CHARACTERIZED
	group_2322	2.1427	53	9.61861	POORLY CHARACTERIZED
	group_2324	25.42	49	1.28141	POORLY CHARACTERIZED
	group_2329	1.0404	60	4.05793	POORLY CHARACTERIZED
	group_2330	1.0258	58	9.723	POORLY CHARACTERIZED
	group_2334	29.8977	47	1.75145	POORLY CHARACTERIZED
	group_2335	1.363	39	40.4382	POORLY CHARACTERIZED
	group_2336	3.9172	50	10.3515	POORLY CHARACTERIZED
	group_2361	1.457	56	18.7335	POORLY CHARACTERIZED
	group_2366	1.3179	45	9.21128	POORLY CHARACTERIZED
	group_2367	27.889	42	9.59736	POORLY CHARACTERIZED
	group_2369	31.6547	46	8.68504	POORLY CHARACTERIZED
	group_238	1.2461	65	11.2254	POORLY CHARACTERIZED
	group_239	1.3383	65	8.46478	POORLY CHARACTERIZED
	group_2397	28.2207	54	9.89917	POORLY CHARACTERIZED
	group_2409	29.7213	48	9.44726	POORLY CHARACTERIZED
	group_2410	2.4703	55	3.36887	POORLY CHARACTERIZED
	group_2415	26.2395	57	9.06401	POORLY CHARACTERIZED
	group_2446	1.7099	64	3.95082	POORLY CHARACTERIZED
	group_2450	31.4734	63	8.88082	POORLY CHARACTERIZED
	group_2452	1.4777	63	5.73151	POORLY CHARACTERIZED
	group_2472	1.3332	50	2.54747	POORLY CHARACTERIZED
	group_248	1.3303	66	7.26456	POORLY CHARACTERIZED
	group_2482	1.3944	46	2.69446	POORLY CHARACTERIZED
	group_2493	23.5859	52	8.9571	POORLY CHARACTERIZED
	group_250	1.2634	66	7.13629	POORLY CHARACTERIZED
	group_2501	1.0337	55	2.95382	POORLY CHARACTERIZED
	group_2509	7.228	50	9.41146	POORLY CHARACTERIZED
	group_251	1.848	65	8.57413	POORLY CHARACTERIZED
	group_2524	35.2965	48	1.39539	POORLY CHARACTERIZED
	group_2529	1.1976	42	9.00015	POORLY CHARACTERIZED
	group_2530	11.486	50	9.13968	POORLY CHARACTERIZED
	group_2539	16.7251	45	3.5897	POORLY CHARACTERIZED
	group_2542	29.7518	44	2.41846	POORLY CHARACTERIZED
	group_2553	1.0521	35	3.7906	POORLY CHARACTERIZED
	group_2554	29.9178	45	9.7555	POORLY CHARACTERIZED
	group_2565	1.5196	47	3.05932	POORLY CHARACTERIZED
	group_2571	12.2007	53	9.92983	POORLY CHARACTERIZED
	group_2583	28.1483	43	2.11009	POORLY CHARACTERIZED
	group_2611	1.1343	48	3.00332	POORLY CHARACTERIZED
	group_2689	32.9121	31	30.4851	POORLY CHARACTERIZED
	group_2703	33.669	38	2.41487	POORLY CHARACTERIZED
	group_2705	1.0063	54	8.94694	POORLY CHARACTERIZED
	group_2707	29.8995	46	8.54239	POORLY CHARACTERIZED
	group_2721	1.4552	59	1.76443	POORLY CHARACTERIZED
	group_2741	14.0585	44	9.93702	POORLY CHARACTERIZED
	group_2743	41.3721	52	9.49033	POORLY CHARACTERIZED
	group_2774	1.7897	56	1.59848	POORLY CHARACTERIZED
	group_2789	1.0547	46	8.24079	POORLY CHARACTERIZED
	group_2816	30.8919	49	9.71234	POORLY CHARACTERIZED
	group_2820	1.2977	48	3.07977	POORLY CHARACTERIZED
	group_2826	1.2905	44	5.50611	POORLY CHARACTERIZED
	group_2827	28.4071	44	8.19386	POORLY CHARACTERIZED
	group_2828	1.2932	42	8.57436	POORLY CHARACTERIZED
	group_2829	29.6436	42	8.19422	POORLY CHARACTERIZED
	group_2834	2.3959	42	4.27625	POORLY CHARACTERIZED
	group_2835	1.2967	44	5.82329	POORLY CHARACTERIZED
	group_2843	9.4904	52	9.83934	POORLY CHARACTERIZED
	group_2845	46.2735	53	9.51488	POORLY CHARACTERIZED
	group_2850	32.1662	38	9.83178	POORLY CHARACTERIZED
	group_2858	23.0598	61	9.754	POORLY CHARACTERIZED
	group_2873	1.5015	57	9.4927	POORLY CHARACTERIZED
	group_2884	18.3357	43	9.87419	POORLY CHARACTERIZED
	group_2892	1.3873	44	43.3275	POORLY CHARACTERIZED
	group_290	97.6469	54	7.14827	POORLY CHARACTERIZED
	group_2905	2.0828	39	4.17255	POORLY CHARACTERIZED
	group_2914	1.0867	56	11.3236	POORLY CHARACTERIZED
	group_2916	10.0661	57	9.87002	POORLY CHARACTERIZED
	group_2923	1.9644	65	3.05001	POORLY CHARACTERIZED
	group_2931	1.0509	57	3.23554	POORLY CHARACTERIZED
	group_2934	32.6508	50	9.86304	POORLY CHARACTERIZED
	group_2942	1.0233	42	6.77751	POORLY CHARACTERIZED
	group_2970	5.0916	71	5.8791	POORLY CHARACTERIZED
	group_2975	2.4693	63	2.6514	POORLY CHARACTERIZED
	group_2985	13.7895	47	9.92972	POORLY CHARACTERIZED
	group_2995	7.6842	55	9.88957	POORLY CHARACTERIZED
	group_3027	27.732	44	9.872	POORLY CHARACTERIZED
	group_303	1.9401	66	26.7757	POORLY CHARACTERIZED
	group_3043	37.2215	52	9.92286	POORLY CHARACTERIZED
	group_3052	27.8265	54	9.62032	POORLY CHARACTERIZED
	group_3073	1.3736	47	1.77329	POORLY CHARACTERIZED
	group_3074	1.2908	53	1.7797	POORLY CHARACTERIZED
	group_3078	22.9399	42	9.4859	POORLY CHARACTERIZED
	group_3085	13.4403	52	9.8508	POORLY CHARACTERIZED
	group_3109	1.4917	48	2.47403	POORLY CHARACTERIZED
	group_3110	1.5995	47	1.62273	POORLY CHARACTERIZED
	group_3119	7.8411	48	9.51545	POORLY CHARACTERIZED
	group_3141	25.8072	49	6.97059	POORLY CHARACTERIZED
	group_3153	14.454	59	1.93108	POORLY CHARACTERIZED
	group_3161	1.31	47	8.70353	POORLY CHARACTERIZED
	group_3162	23.7007	53	9.68917	POORLY CHARACTERIZED
	group_3167	1.8147	45	2.09358	POORLY CHARACTERIZED
	group_3169	1.2756	56	8.30355	POORLY CHARACTERIZED
	group_3174	53.3453	53	9.89794	POORLY CHARACTERIZED
	group_3179	23.3251	50	1.72714	POORLY CHARACTERIZED
	group_3180	34.9871	59	2.02095	POORLY CHARACTERIZED
	group_3191	1.4652	52	2.08536	POORLY CHARACTERIZED
	group_3199	30.7716	44	9.41913	POORLY CHARACTERIZED
	group_3203	19.7606	53	2.19807	POORLY CHARACTERIZED
	group_3204	1.7235	53	2.84218	POORLY CHARACTERIZED
	group_3218	116.838	38	9.23971	POORLY CHARACTERIZED
	group_3225	21.6517	37	8.9898	POORLY CHARACTERIZED
	group_3230	1.0975	47	2.2075	POORLY CHARACTERIZED
	group_3236	1.1767	48	9.86903	POORLY CHARACTERIZED
	group_3243	1.1691	49	9.24085	POORLY CHARACTERIZED
	group_3255	26.1954	49	9.67015	POORLY CHARACTERIZED
	group_3269	1.3449	51	7.74558	POORLY CHARACTERIZED
	group_3280	3.1162	47	9.15891	POORLY CHARACTERIZED
	group_3311	23.6197	51	1.27024	POORLY CHARACTERIZED
	group_3325	7.499	50	9.89235	POORLY CHARACTERIZED
	group_3337	9.9068	50	9.85528	POORLY CHARACTERIZED
	group_3339	23.9794	39	9.74388	POORLY CHARACTERIZED
	group_334	5.1048	59	9.67891	POORLY CHARACTERIZED
	group_3349	11.1413	41	9.94339	POORLY CHARACTERIZED
	group_3350	26.1227	56	2.87137	POORLY CHARACTERIZED
	group_3357	28.7048	64	1.93866	POORLY CHARACTERIZED
	group_3361	1.26	54	4.22283	POORLY CHARACTERIZED
	group_3362	28.835	46	9.8098	POORLY CHARACTERIZED
	group_3372	28.7605	47	9.87249	POORLY CHARACTERIZED
	group_3381	42.0085	51	10.5358	POORLY CHARACTERIZED
	group_3383	25.7412	65	2.20357	POORLY CHARACTERIZED
	group_3400	28.3925	49	10.0963	POORLY CHARACTERIZED
	group_3401	24.5521	53	2.24999	POORLY CHARACTERIZED
	group_3410	1.1379	48	3.6543	POORLY CHARACTERIZED
	group_3418	1.0509	55	9.37336	POORLY CHARACTERIZED
	group_3434	1.5318	47	9.64059	POORLY CHARACTERIZED
	group_3453	7.6301	42	9.59037	POORLY CHARACTERIZED
	group_3456	14.4076	44	9.74101	POORLY CHARACTERIZED
	group_3478	25.6628	51	9.30866	POORLY CHARACTERIZED
	group_3482	1.0802	53	1.21695	POORLY CHARACTERIZED
	group_3489	48.2931	60	9.62547	POORLY CHARACTERIZED
	group_3492	25.0359	62	2.60359	POORLY CHARACTERIZED
	group_3499	8.7058	36	9.86959	POORLY CHARACTERIZED
	group_3514	20.745	47	9.50799	POORLY CHARACTERIZED
	group_3523	9.223	49	9.61406	POORLY CHARACTERIZED
	group_3525	8.4348	50	9.86497	POORLY CHARACTERIZED
	group_3527	1.5661	55	2.62702	POORLY CHARACTERIZED
	group_3530	9.1802	57	9.90074	POORLY CHARACTERIZED
	group_3532	21.4213	46	2.33722	POORLY CHARACTERIZED
	group_3534	28.4244	46	9.3525	POORLY CHARACTERIZED
	group_3538	29.161	67	10.0221	POORLY CHARACTERIZED
	group_3546	32.0452	56	9.8265	POORLY CHARACTERIZED
	group_3547	2.1182	47	1.82949	POORLY CHARACTERIZED
	group_3564	34.7922	43	10.0842	POORLY CHARACTERIZED
	group_3565	1.5496	47	3.14936	POORLY CHARACTERIZED
	group_3567	9.7849	54	9.85041	POORLY CHARACTERIZED
	group_357	42.8948	51	9.63622	POORLY CHARACTERIZED
	group_3572	31.2731	49	9.11635	POORLY CHARACTERIZED
	group_358	2.0386	51	10.1728	POORLY CHARACTERIZED
	group_3585	2.5384	41	38.8411	POORLY CHARACTERIZED
	group_3586	30.1866	50	9.60548	POORLY CHARACTERIZED
	group_359	20.9056	27	17.9831	POORLY CHARACTERIZED
	group_3591	1.0027	47	4.80095	POORLY CHARACTERIZED
	group_3594	11.1119	47	9.81241	POORLY CHARACTERIZED
	group_3609	29.3551	28	9.90816	POORLY CHARACTERIZED
	group_3615	40.8112	48	9.83443	POORLY CHARACTERIZED
	group_3617	2.3287	66	3.24207	POORLY CHARACTERIZED
	group_3619	1.0092	58	2.0045	POORLY CHARACTERIZED
	group_3635	1.3068	30	1.33254	POORLY CHARACTERIZED
	group_364	1.2003	69	5.60411	POORLY CHARACTERIZED
	group_3644	18.9061	55	4.47717	POORLY CHARACTERIZED
	group_3645	36.9854	59	8.43863	POORLY CHARACTERIZED
	group_3648	36.1028	60	9.87979	POORLY CHARACTERIZED
	group_3661	1.1608	63	42.559	POORLY CHARACTERIZED
	group_3664	27.2933	56	30.1712	POORLY CHARACTERIZED
	group_3669	36.5571	61	9.79954	POORLY CHARACTERIZED
	group_3674	22.7456	57	1.77371	POORLY CHARACTERIZED
	group_368	2.0469	69	3.35493	POORLY CHARACTERIZED
	group_3688	1.7085	67	4.01114	POORLY CHARACTERIZED
	group_3702	1.3961	53	7.98675	POORLY CHARACTERIZED
	group_371	1.8959	69	4.76947	POORLY CHARACTERIZED
	group_372	1.9622	69	1.60929	POORLY CHARACTERIZED
	group_3734	10.3927	60	9.65527	POORLY CHARACTERIZED
	group_3748	25.459	48	9.7861	POORLY CHARACTERIZED
	group_3760	1.1843	51	2.50943	POORLY CHARACTERIZED
	group_3763	25.3612	55	9.8574	POORLY CHARACTERIZED
	group_3775	29.9483	55	9.73063	POORLY CHARACTERIZED
	group_3777	1.27	53	3.41042	POORLY CHARACTERIZED
	group_3783	6.0397	59	9.82028	POORLY CHARACTERIZED
	group_3785	8.4475	41	9.85468	POORLY CHARACTERIZED
	group_3786	41.043	49	10.0925	POORLY CHARACTERIZED
	group_3789	1.2947	41	3.9838	POORLY CHARACTERIZED
	group_3792	1.0087	47	11.1145	POORLY CHARACTERIZED
	group_3808	1.2379	38	22.9443	POORLY CHARACTERIZED
	group_3810	1.5232	57	2.15483	POORLY CHARACTERIZED
	group_3811	1.2046	55	3.2679	POORLY CHARACTERIZED
	group_3817	1.1137	52	2.51089	POORLY CHARACTERIZED
	group_3821	28.8589	54	2.09389	POORLY CHARACTERIZED
	group_3827	34.2308	43	9.80346	POORLY CHARACTERIZED
	group_3850	26.2667	50	9.76245	POORLY CHARACTERIZED
	group_386	1.1367	66	69.6423	POORLY CHARACTERIZED
	group_3873	1.2501	49	3.1947	POORLY CHARACTERIZED
	group_3911	10.802	40	9.89686	POORLY CHARACTERIZED
	group_3919	31.9681	55	9.89734	POORLY CHARACTERIZED
	group_3925	19.5638	58	9.84572	POORLY CHARACTERIZED
	group_3929	29.5785	53	9.89622	POORLY CHARACTERIZED
	group_3952	20.6821	42	9.10266	POORLY CHARACTERIZED
	group_3955	17.0075	50	9.92249	POORLY CHARACTERIZED
	group_3971	30.9765	51	9.78641	POORLY CHARACTERIZED
	group_3977	23.7768	45	9.36485	POORLY CHARACTERIZED
	group_3981	25.5025	56	9.93732	POORLY CHARACTERIZED
	group_3983	23.9794	49	9.84193	POORLY CHARACTERIZED
	group_3985	10.7324	54	9.94466	POORLY CHARACTERIZED
	group_3989	28.5436	56	9.71679	POORLY CHARACTERIZED
	group_4018	23.8782	47	9.84678	POORLY CHARACTERIZED
	group_402	1.5123	48	53.2893	POORLY CHARACTERIZED
	group_4038	10.0062	53	9.91762	POORLY CHARACTERIZED
	group_404	9.6707	55	9.71334	POORLY CHARACTERIZED
	group_4050	10.7302	46	9.43903	POORLY CHARACTERIZED
	group_4062	9.1993	62	9.67509	POORLY CHARACTERIZED
	group_4077	45.2951	50	9.82087	POORLY CHARACTERIZED
	group_4095	37.439	58	9.84445	POORLY CHARACTERIZED
	group_4108	30.339	48	9.93119	POORLY CHARACTERIZED
	group_4116	1.1063	48	9.73948	POORLY CHARACTERIZED
	group_4122	8.0203	58	9.83273	POORLY CHARACTERIZED
	group_4127	33.3577	51	9.94724	POORLY CHARACTERIZED
	group_4130	1.0034	55	2.64071	POORLY CHARACTERIZED
	group_4157	36.0762	55	9.08626	POORLY CHARACTERIZED
	group_4190	32.4308	53	9.85245	POORLY CHARACTERIZED
	group_4323	15.8683	53	9.93412	POORLY CHARACTERIZED
	group_4345	64.8082	33	9.93976	POORLY CHARACTERIZED
	group_4498	10.6999	47	9.94527	POORLY CHARACTERIZED
	group_455	1.1193	64	1.98242	POORLY CHARACTERIZED
	group_461	1.7542	56	4.77254	POORLY CHARACTERIZED
	group_48	18.1724	60	3.16756	POORLY CHARACTERIZED
	group_49	17.6876	60	3.42436	POORLY CHARACTERIZED
	group_53	1.8744	64	10.8478	POORLY CHARACTERIZED
	group_55	5.5958	64	18.8043	POORLY CHARACTERIZED
	group_671	9.1655	64	9.83416	POORLY CHARACTERIZED
	group_672	1.4728	64	5.68436	POORLY CHARACTERIZED
	group_6722	24.9338	49	9.87451	POORLY CHARACTERIZED
	group_674	1.2012	63	10.1856	POORLY CHARACTERIZED
	group_6745	5.3129	43	9.71196	POORLY CHARACTERIZED
	group_7075	33.1108	54	9.9437	POORLY CHARACTERIZED
	group_7391	26.548	50	9.10736	POORLY CHARACTERIZED
	group_749	1.0175	33	2.30662	POORLY CHARACTERIZED
	group_7888	16.4466	53	9.94449	POORLY CHARACTERIZED
	group_8108	13.257	61	9.94238	POORLY CHARACTERIZED
	group_8250	1.3908	67	7.77228	POORLY CHARACTERIZED
	group_8275	26.2068	58	9.7394	POORLY CHARACTERIZED
	group_8366	21.021	48	9.87347	POORLY CHARACTERIZED
	group_8390	10.2332	52	9.90235	POORLY CHARACTERIZED
	group_8395	38.7931	59	9.79743	POORLY CHARACTERIZED
	group_8423	29.3076	43	9.91219	POORLY CHARACTERIZED
	group_8429	29.3141	52	9.92726	POORLY CHARACTERIZED
	group_8455	7.8106	39	9.85442	POORLY CHARACTERIZED
	group_8462	13.221	41	9.94409	POORLY CHARACTERIZED
	group_8464	37.2689	50	9.93855	POORLY CHARACTERIZED
	group_8468	25.6048	56	9.91909	POORLY CHARACTERIZED
	group_8501	13.0296	57	9.83052	POORLY CHARACTERIZED
	group_8516	12.8615	54	9.91451	POORLY CHARACTERIZED
	group_8545	8.6579	55	10.009	POORLY CHARACTERIZED
	group_8581	1.7514	73	2.08966	POORLY CHARACTERIZED
	group_8583	24.5436	40	9.78145	POORLY CHARACTERIZED
	group_8742	18.5016	42	9.83772	POORLY CHARACTERIZED
	group_9096	18.7058	68	10.3402	POORLY CHARACTERIZED
	group_941	2.9858	64	2.77683	POORLY CHARACTERIZED
	group_945	25.1797	63	1.74587	POORLY CHARACTERIZED
	group_946	1.0719	63	4.97124	POORLY CHARACTERIZED
	group_9477	1.1151	68	7.53481	POORLY CHARACTERIZED
	group_9480	1.3266	70	9.74284	POORLY CHARACTERIZED
	group_956	1.5379	64	1.95015	POORLY CHARACTERIZED
	group_957	1.1695	63	14.6652	POORLY CHARACTERIZED
	group_9626	19.8379	54	9.55902	POORLY CHARACTERIZED
	group_9666	1.4259	60	8.8106	POORLY CHARACTERIZED
	group_9686	11.1117	42	9.74576	POORLY CHARACTERIZED
	group_9813	1.1677	54	9.38557	POORLY CHARACTERIZED
	group_9815	30.234	52	9.82696	POORLY CHARACTERIZED
	group_9860	33.3669	51	9.84887	POORLY CHARACTERIZED
	group_9981	9.0363	49	9.87034	POORLY CHARACTERIZED
	hcaB	1.0363	51	2.71003	POORLY CHARACTERIZED
	higB_2	13.737	53	9.93176	POORLY CHARACTERIZED
	korB	1.6288	46	2.56033	POORLY CHARACTERIZED
	lpxD_3	1.1686	49	3.61605	POORLY CHARACTERIZED
	lpxD_5	30.3469	41	8.93407	POORLY CHARACTERIZED
	norV	1.0627	51	1.21216	POORLY CHARACTERIZED
	nusB	40.321	53	9.69274	POORLY CHARACTERIZED
	pilE	34.7176	49	10.0185	POORLY CHARACTERIZED
	rssB_2	1.0405	53	0.886117	POORLY CHARACTERIZED
	secE	8.5317	43	9.90748	POORLY CHARACTERIZED
	sgcD_1	1.2056	43	9.51207	POORLY CHARACTERIZED
	sgcG	14.9021	38	9.86241	POORLY CHARACTERIZED
	traD	1.1073	45	33.8006	POORLY CHARACTERIZED
	trfB	1.0279	41	2.01905	POORLY CHARACTERIZED
	yceI_2	1.2793	51	76.6477	POORLY CHARACTERIZED
	yqeY	1.0735	50	8.96874	POORLY CHARACTERIZED
	yybR	2.6017	51	6.23206	POORLY CHARACTERIZED
